# Supplementary material for: Allyl- and propargylchromium reagents generated by a chromium(iii) ate-type reagent as a reductant and their reactions with electrophiles
Source: Royal Society of Chemistry journal article supplement (doi:10.1039/b009351n), 2001-01-01
Supplement: b009351n.doc [file b009351n.doc]

# Electronic Supplementary Information

**Allyl- and propargylchromium reagents generated by a chromium(III) ate-type reagent as a reductant and their reactions with electrophiles**

Makoto Hojo, Rie Sakuragi, Satoru Okabe, and Akira Hosomi*

*Department of Chemistry, Graduate School of Pure and Applied Sciences*

*University of Tsukuba, Tsukuba, Ibaraki 305-8571, Japan*

* For inquiries, please address to

Professor Akira HOSOMI

Phone: +81-298-53-4237

Facsimile: +81-298-53-6503

E-mail: hosomi@chem.tsukuba.ac.jp

## Experimental Section

Boiling points listed in the section for compound data were determined with Kugelrohr distillation apparatus. Gas chromatography was carried out with Shimadzu GC-8A (column; PEG 2 M, rate of flow; 60 mL / min). 1H NMR spectra at 270 MHz and 13C NMR spectra at 67.7 MHz were determined on a JEOL JNM-EX270 instrument with tetramethylsilane ( = 0.00 ppm) or chloroform (1H, 7.26 ppm; 13C, 77.0 ppm) as an internal standard. Infrared spectra were measured with a Shimadzu IR-460 spectrophotometer. Mass spectra were measured (by EI method) on a Shimadzu GCMS-QP2000, QP5000, and JEOL JMS-GCMATE (HRMS) instruments. Microanalyses were performed by the Analysis Center of University of Tsukuba.

**Solvents and Reagents.** Unless otherwise specified, the following solvents and reagents (reagent grade) were used without further purification: sodium hydride, copper sulfate, magnesium, phosphorus tribromide, *N*,*N*-dimethylaminopyridine, and *p*-toluenesulfonamide (Wako Pure Chemical Industries Ltd.); 1,2-dibromoethane (Kanto Chemical Co., Inc.); vinyl bromide (Tokyo Chemical Industry Co., Ltd.). Chromium(III) chloride (Kishida Chemical Co., Ltd.) was ground into powder prior to use. A solution of butyllithium in hexane and a solution of diisobutylaluminum hydride in toluene were purchased (from Kanto Chemical Co., Inc.) and used without purification. Acetic anhydride, diethyl chlorophosphate, and ethyl diethylphosphonoacetate were distilled prior to use. Pyridine, 2-propene-1-ol, 2-buten-1-ol, 2-methyl-2-propen-1-ol, 3-buten-2-ol, benzaldehyde dimethyl acetal, benzaldehyde, acetophenone, pivalaldehyde, 2-propyn-1-ol, and furfural were distilled over calcium hydride under nitrogen atmosphere. Heptanal, cyclohexanecarboxaldehyde, cyclohexanone, 2-cyclohexen-1-one, 3-phenylpropanal, methyl levulinate, and phenyl isocyanate were distilled over molecular sieves (4A) under nitrogen atmosphere. Tetrahydrofuran (THF), diethyl ether (Et2O), benzene, and toluene were dried and distilled from benzophenone and sodium immediately prior to use under nitrogen atmosphere.

**Preparation of Diethyl 5-Phenyl-1-penten-3-yl phosphate (1a).** *5-Phenyl-1-penten-3-ol.* A 500 mL three-necked round bottom flask containing magnesium (9.1 g, 380 mmol) and a stirring bar was fitted with a rubber septum, a dropping funnel, and a dewar condenser with a three-way stopcock connected to a balloon filled with nitrogen. The apparatus was dried with a heating-gun under reduced pressure and purged with nitrogen. A dewar condenser was cooled with dry ice-methanol. Vinyl bromide (38 g, 355 mmol, 25 mL) and THF (30 mL) were introduced to a dropping funnel and a flask, respectively. Without stirring, 1,2-dibromoethane (0.2 mL) was added and the bottom of the flask was locally heated by a heating-gun. After small bubbles appeared, a small amount of vinyl bromide, without dilution, was added from a dropping funnel. When a reaction started vigorously, THF (70 mL and 250 mL) was introduced to a dropping funnel and a reaction flask, respectively. The solution of vinyl bromide in THF (about 95 mL) was added dropwise from a dropping funnel over 2 h, with stirring the reaction mixture. After addition of the solution of vinyl bromide in THF, the reaction mixture was heated to reflux for 90 min. After cooling the mixture, a solution of vinylmagnesium bromide in THF was transferred *via* a double-ended needle to another dried and nitrogen-purged 500 mL three-necked round bottom flask fitted with a rubber septum, a dropping funnel and a reflux condenser with a three-way stopcock connected to a balloon filled with nitrogen. A flask containing the Grignard reagent was cooled to 0 °C. A solution of 3-phenylpropanal in THF (40.2 g, 300 mmol, 39.5 mL/ 50 mL) was slowly added from a dropping funnel for 2 h. After refluxed for further 1 h, saturated NH4Cl (50 mL) was added to the resultant mixture at room temperature. Extraction with ethyl acetate (50 mL x 3), washing the organic layer with NaHCO3 (50 mL), drying over Na2SO4, and evaporation of solvents gave a crude product. A pure product was obtained by distillation (46.7 g, 290 mmol, 96%). bp 100 °C/ 0.05 mmHg; R*f* = 0.2 (hexane/ ethyl acetate = 20 : 1). 1H NMR (CDCl3)  1.62 (brs, 1H), 1.81-1.90 (m, 2H), 2.71 (t, *J* = 7.9 Hz, 2H), 4.12 (dt, *J* = 10.6, 6.6 Hz, 1H), 5.13 (d, *J* = 10.2 Hz, 1H), 5.24 (d, *J* = 17.2 Hz, 1H), 5.90 (ddd, *J* = 17.2, 10.6, 10.2 Hz, 1H), 7.18-7.31 (m, 5H); 13C NMR (CDCl3)  31.6 (CH2), 38.5 (CH2), 72.5 (CH), 114.9 (CH2), 125.8 (CH), 128.37 (CH x 2), 128.43 (CH x 2), 141.0 (CH), 141.8 (quart.); IR (neat film) 3360 (s), 2925 (m), 1602 (w), 1495 (m), 1454 (m), 1421 (m), 1315 (w), 1271 (w), 1117 (w), 1040 (m), 991 (m), 924 (m), 748 (m), 698 (s) cm-1; mass spectrum *m/z* (% relative intensity) 162 (M+, 14), 144 (20), 129 (53), 115 (6), 105 (36), 91 (100), 78 (23), 57 (89), 51 (22). Anal. Calcd for C11H14O: C, 81.44; H, 8.70. Found: C, 81.38; H, 8.82.

*Diethyl 5-Phenyl-1-penten-3-yl Phosphate (****1a****).* A 100 mL two-necked round bottom flask containing a stirring bar was fitted with a rubber septum and a three-way stopcock connected to a balloon filled with nitrogen. The apparatus was dried with a heating-gun under reduced pressure and purged with nitrogen. 5-Phenyl-1-penten-3-ol (4.86 g, 30.0 mmol) and pyridine (30 mL) were introduced to the flask, and the mixture was cooled to 0 °C. Diethyl chlorophosphate (4.70 g, 30 mmol) was slowly added to the flask. The temperature of the mixture was raised to room temperature over 30 min. After stirring the mixture for further 2 h, a 5% solution of CuSO4 (15 mL) was added to the mixture. Extraction with ethyl acetate (30 mL x 3), washing the organic layer with NaHCO3 (15 mL), drying over Na2SO4, and evaporation of solvents gave a crude product. A pure product was obtained by chromatography on silica gel (8.15 g, 27.3 mmol, 95%). bp 150 °C/ 0.005 mmHg; R*f* = 0.1 (hexane/ ethyl acetate = 3 : 1). 1H NMR (CDCl3)  1.32 (td, *J* = 7.3, 1.0 Hz, 3H), 1.33 (td, *J* = 7.3, 1.0 Hz, 3H), 1.83-2.14 (m, 2H), 2.6-2.8 (m, 2H), 4.03-4.17 (m, 4H), 4.81 (dq, *J*P-H = 6.6 Hz, *J* = 6.9 Hz, 1H), 5.25 (dt, *J* = 10.2, 1.0 Hz, 1H), 5.35 (dt, *J* = 17.2, 1.3 Hz, 1H), 5.89 (ddd, *J* = 17.2, 10.2, 6.9 Hz, 1H), 7.16-7.32 (m, 5H); 13C NMR (CDCl3)  16.1 (CH3 x 2), 31.0 (CH2), 37.5 (CH2), 63.6 (d, *J*P-C = 6.1 Hz, CH2 x 2), 79.1 (d, *J*P-C = 4.9 Hz, CH), 117.5 (CH2), 126.0 (CH), 128.4 (CH x 4), 136.7 (CH), 141.3 (quart.); IR (neat film) 2980 (w), 1269 (m), 1165 (w), 1032 (s), 1009 (s), 982 (s), 749 (w) cm-1.

**Preparation of 1-Bromo-5-phenyl-2-pentene.** *Ethyl 5-Phenyl-2-pentenoate.*1A 300 mL three-necked round bottom flask containing a stirring bar was fitted with a rubber septum, a dropping funnel and a condenser with a three-way stopcock connected to a balloon filled with nitrogen. The apparatus was dried with a heating-gun under reduced pressure and purged with nitrogen. Sodium hydride (3.43 g, 100 mmol, 70% dispersion) was introduced to the flask, and the sodium hydride was washed with benzene (10 mL x 3). Benzene (30 mL) was added to the flask, and the mixture was heated to 30-35 °C. Ethyl diethylphosphonoacetate (22.42 g, 100 mmol) was slowly added from a dropping funnel and the mixture was refluxed for 1 h. After cooling the mixture to room temperature, 3-phenylpropionaldehyde (13.42 g, 100 mmol) was slowly added to the mixture from a dropping funnel. The mixture was heated to 60 °C and stirred for 10 min. The resultant mixture was cooled to 40 °C, and the solution part was collected by decantation. The residue was washed with benzene (30 mL x 7). The combined organic layer was concentrated under reduced pressure, and Et2O was added. The ethereal solution was washed with saturated NaHCO3 and dried over Na2SO4. After evaporation of solvents, a crude mixture was obtained and the mixture was subjected to chromatography on silica gel (14.7 g, 72 mmol, 72%). R*f* = 0.2 (hexane/ ethyl acetate = 30 : 1). 1H NMR (CDCl3)  1.28 (t, *J* = 7.3 Hz, 3H), 2.51 (dt, *J* = 7.3, 6.9 Hz, 2H), 2.77 (t, *J* = 7.3 Hz, 2H), 4.18 (q, *J* = 7.3 Hz, 2H), 5.84 (dt, *J* = 15.8, 1.3 Hz, 1H), 7.01 (dt, *J* = 15.8, 6.9 Hz, 1H), 7.16-7.32 (m, 5H).

*5-Phenyl-2-penten-1-ol.*2 A 300 mL three-necked round bottom flask containing a stirring bar was fitted with a rubber septum, a dropping funnel and a condenser with a three-way stopcock connected to a balloon filled with nitrogen. The apparatus was dried with a heating-gun under reduced pressure and purged with nitrogen. Ethyl 5-phenyl-2-pentenoate (6.53 g, 32.0 mmol) and toluene (60 mL) were introduced to the flask, and the solution was cooled to –78 °C. A solution of diisobutylaluminum hydride in toluene (1.01 M, 70 mmol, 69 mL) was slowly added. The color of the solution changed to yellow. The mixture was stirred at the same temperature for 2 h. The reaction was quenched with saturated NH4Cl (50 mL). After filtration and extraction from the filtrate with ethyl acetate (30 mL x 3), the organic layer was washed with saturated NaHCO3 (30 mL). Drying over Na2SO4, evaporation of solvents gave a crude product. This crude mixture was subjected to chromatography on silica gel to obtain a pure product, 5-phenyl-2-penten-1-ol (4.82 g, 29.7 mmol, 93%). bp 100 °C/ 0.1 mmHg; R*f* = 0.2 (hexane/ ethyl acetate = 7 : 1); GC 9.83 min (70-190 °C, 10 °C/ min, PEG 2 M). 1H NMR (CDCl3)1.38 (br, 1H), 2.37 (dt, *J* = 5.6, 7.3 Hz, 2H), 2.71 (t, *J* = 7.3 Hz, 2H), 4.07 (d, *J* = 4.6 Hz, 2H), 5.65 (dt, *J* = 15.5, 4.6 Hz, 1H), 5.74 (dt, *J* = 15.5, 5.6 Hz, 1H), 7.16-7.31 (m, 5H); 13C NMR (CDCl3)33.5 (CH2), 35.0 (CH2), 63.2 (CH2), 125.4 (CH), 127.8 (CH x 2), 127.9 (CH x 2), 129.1 (CH), 131.8 (CH), 141.2 (quart.); IR (neat film) 3325 (m), 3015 (m), 2915 (m), 2845 (m), 1494 (w), 1449 (w), 1077 (m), 994 (m), 964 (m), 743 (m), 695 (m) cm-1; mass spectrum *m/z* (% relative intensity) 162 (M+, 1), 144 (33), 129 (22), 108 (8), 91 (100), 77 (8), 65 (36), 41 (25). Anal. Calcd for C11H14O: C, 81.44; H, 8.70. Found: C, 81.22; H, 8.76.

*1-Bromo-5-phenyl-2-pentene.*3 A 100 mL two-necked round bottom flask containing a stirring bar was fitted with a rubber septum and a three-way stopcock connected to a balloon filled with nitrogen. The apparatus was dried with a heating-gun under reduced pressure and purged with nitrogen. 5-Phenyl-2-penten-1-ol (3.24 g, 20 mmol) and Et2O (40 mL) were introduced to the flask, and the flask was cooled to –40 °C. PBr3 (1.89 g, 7.0 mmol) was added dropwise to the flask. The temperature of the mixture was raised to –20 °C over 2 h. A saturated NaHCO3 (10 mL) was added to the mixture. Extraction with Et2O (20 mL x 3), washing the ethereal solution with brine (10 mL), drying over Na2SO4, and evaporation of solvents gave a crude mixture. A pure product, 1-bromo-5-phenyl-2-pentene2b was obtained after distillation under reduced pressure (4.26 g, 19 mmol, 95 %). bp 110 °C/ 0.1 mmHg. 1H NMR (CDCl3)2.39 (dt, *J* = 7.3, 6.3 Hz, 2H), 2.70 (t, *J* = 7.3 Hz, 2H), 3.93 (d, *J* = 6.6 Hz, 2H), 5.71 (dt, *J* = 15.2, 6.6 Hz, 1H), 5.81 (dt, *J* = 15.2, 6.3 Hz, 1H), 7.15-7.31 (m, 5H); 13C NMR (CDCl3)33.3 (CH2), 33.8 (CH2), 35.2 (CH2), 126.0 (CH), 127.0 (CH), 128.4 (CH x 4), 135.4 (CH), 141.3 (quart.); IR (neat film) 3025 (m), 2930 (m), 2350 (w), 1737 (w), 1714 (w), 1652 (w), 1601 (w), 1493 (m), 1451 (m), 1435 (m), 1205 (m), 1077 (w), 1028 (w), 967 (m), 746 (m), 698 (s) cm-1; mass spectrum *m/z* (% relative intensity) 224 (M+, 1), 182 (1), 145 (41), 128 (3), 91 (100), 77 (5), 65 (30). Anal. Calcd for C11H13Br: C, 58.69; H, 5.82. Found: C, 59.22; H, 6.00.

**Preparation of Diethyl 5-Phenyl-2-penten-3-yl Phosphate (1b).**4A 100 mL two-necked round bottom flask containing a stirring bar was fitted with a rubber septum and a three-way stopcock connected to a balloon filled with nitrogen. The apparatus was dried with a heating-gun under reduced pressure and purged with nitrogen. 5-Phenyl-1-penten-3-ol (3.24 g, 20.0 mmol) and pyridine (20 mL) were introduced to the flask, and the mixture was cooled to 0 °C. Diethyl chlorophosphate (3.13 g, 20 mmol) was slowly added to the flask. The temperature of the mixture was raised to room temperature over 30 min. After stirring the mixture for further 2 h, a 5% solution of CuSO4 (10 mL) was added to the mixture. Extraction with ethyl acetate (20 mL x 3), washing the organic layer with NaHCO3 (10 mL), drying over Na2SO4, and evaporation of solvents gave a crude product. A pure product was obtained by chromatography on silica gel (3.3 g, 16.9 mmol, 85%). bp 170 °C/ 0.05 mmHg; R*f* = 0.1 (hexane/ ethyl acetate = 2 : 1). 1H NMR (CDCl3)  1.33 (t, *J* = 7.3 Hz, 6H), 2.39 (dt, *J* = 7.3, 6.6 Hz, 2H), 2.71 (t, *J* = 7.3 Hz, 2H), 4.10 (dq, *J*P-H = 7.9 Hz, *J* = 7.3 Hz, 4H), 4.47 (dd, *J*P-H = 7.3 Hz, *J* = 6.6 Hz, 2H), 5.64 (dt, *J* = 15.5, 6.3 Hz, 1H), 5.84 (dt, *J* = 15.5, 6.6 Hz, 1H), 7.16-7.31(m, 5H); 13C NMR (CDCl3)  16.1 (CH3 x 2), 33.9 (CH2), 35.2 (CH2), 63.7 (d, *J*P-C = 4.8 Hz, CH2 x 2), 67.9 (d, *J*P-C = 6.1 Hz, CH2), 125.1 (CH), 125.9 (CH), 128.4 (CH x 4), 135.2 (CH), 141.4 (quart.); IR (neat film) 3545 (w), 2970 (m), 1449 (m), 1391 (s), 1276 (s), 1164 (w), 1029 (s), 974 (s), 747 (m), 698 (m) cm-1. Anal. Calcd for C15H23O4P: C, 60.39; H, 7.77. Found: C, 60.27; H, 7.96.

**Preparation of 5-Phenyl-2-pentenyl Acetate.** A 100 mL two-necked round bottom flask containing a stirring bar was fitted with a rubber septum and a three-way stopcock connected to a balloon filled with nitrogen. The apparatus was dried with a heating-gun under reduced pressure and purged with nitrogen. 5-Phenyl-2-penten-1-ol (3.24 g, 20.0 mmol) and pyridine (40 mL) were introduced to the flask, and acetic anhydride (3.06 g, 30 mmol) and *N*,*N*-dimethylaminopyridine (10 mg, 0.1 mmol) were added at room temperature. The mixture was stirred for 6 h, and saturated NH4Cl (10 mL) was added to the mixture. Extraction with Et2O (20 mL x 3), washing the combined ethereal solution with NaHCO3 (10 mL), drying over Na2SO4, and evaporation of solvents gave a crude product. A pure product was obtained by chromatography on silica gel (3.67 g, 18.0 mmol, 90%). R*f* = 0.4, (hexane/ ethyl acetate = 50 : 1). 1H NMR (CDCl3)2.04 (s, 3H), 2.38 (dt, *J* = 8.3, 6.6 Hz, 2H), 2.70 (t, *J* = 8.3 Hz, 2H), 4.50 (d, *J* = 6.3 Hz, 2H), 5.62 (dt, *J* = 15.2, 6.3 Hz, 1H), 5.81 (dt, *J* = 15.2, 6.6 Hz, 1H), 7.15-7.31 (m, 5H); mass spectrum *m/z* (% relative intensity) 204 (M+, 1), 181 (1), 162 (1), 144 (73), 129 (58), 115 (8), 108 (31), 91 (100), 71 (13), 65 (47), 43 (89).

**Diethyl 2-Propenyl Phosphate (1c).**5Diethyl 2-propenyl phosphate (**1c**) was prepared in the same manner as **1b**, from 2-propen-1-ol (1.16 g, 20 mmol) and diethyl chlorophosphate (3.13 g, 20 mmol) in 96% yield (3.72 g, 19.2 mmol). bp 70 °C/ 0.5 mmHg; R*f* = 0.2 (hexane/ ethyl acetate = 3 : 1); GC 5.10 min (70-190 °C, 10 °C/ min, PEG 2 M). 1H NMR (CDCl3)  1.35 (t, *J* = 7.3 Hz, 6H), 4.12 (dq, *J*P-H = 7.9 Hz, *J* = 7.3 Hz, 4H), 4.53 (dd, *J*P-H = 7.9 Hz, *J* = 6.9 Hz, 2H), 5.27 (d, *J* = 10.2 Hz, 1H), 5.38 (d, *J* = 17.1 Hz, 1H), 5.95 (ddt, *J* = 17.1, 10.2, 6.9 Hz, 1H); 13C NMR (CDCl3)  16.1 (CH3 x 2), 63.8 (d, *J*P-C = 6.1 Hz, CH2 x 2), 67.9 (d, *J*P-C = 6.1 Hz, CH2), 118.1 (CH2), 132.7 (CH); IR (neat film) 3535 (w), 2930 (m), 1391 (w), 1366 (w), 1277 (s), 1166 (m), 1100 (m), 1026 (s), 976 (s), 864 (m), 841 (m), 814 (m), 749 (m), 669 (m) cm-1; mass spectrum *m/z* (% relative intensity) 194 (M+, 3), 167 (19), 138 (47), 125 (31), 99 (89), 91 (10), 81 (50), 57 (64), 41 (100). Anal. Calcd for C7H15O4P: C, 43.30; H, 7.79. Found: C, 43.36; H, 7.87.

**Diethyl 2-Butenyl Phosphate (1d).** Diethyl 2-butenyl phosphate (**1d**) was prepared in the same manner as **1b**, from 2-buten-1-ol (1.44 g, 20 mmol) and diethyl chlorophosphate (3.13 g, 20 mmol) in 95% yield (3.95 g, 19.0 mmol). bp 80 °C/ 0.3 mmHg; R*f* = 0.2 (hexane/ ethyl acetate = 3 : 1); GC 6.37 min (70-190 °C, 10 °C/ min, PEG 2 M). 1H NMR (CDCl3) *trans* isomer  1.32 (t, *J* = 7.2 Hz, 6H), 1.73 (dd, *J* = 6.3, 1.3 Hz, 3H), 4.09 (dq, *J*P-H = 7.9 Hz, *J* = 7.2 Hz, 4H), 4.46 (ddd, *J*P-H = 7.6 Hz, *J* = 7.3, 1.0 Hz, 2H), 5.63 (dtq, *J* = 15.2, 7.3, 1.0 Hz, 1H), 5.81 (dtq, *J* = 15.2, 6.3, 1.0 Hz, 1H), *cis* isomer  4.61 (ddd, *J*P-H = 7.6 Hz, *J* = 7.3, 1.0 Hz, 2H); 13C NMR (CDCl3) *trans* isomer  16.1 (CH3 x 2), 17.7 (CH3), 63.6 (d, *J*P-C = 6.1 Hz, CH2 x 2), 68.1 (d, *J*P-C = 6.1 Hz, CH2), 125.6 (CH2), 131.4 (CH2); IR (neat film) 3530 (m), 2980 (m), 1667 (w), 1439 (m), 1394 (m), 1263 (m), 1160 (s), 1018 (s), 969 (s), 841 (m), 816 (m), 768 (s), 743 (w), 661 (w) cm-1; mass spectrum *m/z* (% relative intensity) 208 (M+, 14), 179 (5), 155 (30), 127 (42), 99 (95), 82 (23), 81 (47), 54 (100). Anal. Calcd for C8H17O4P: C, 46.13; H, 8.23. Found: C, 46.33; H, 8.48.

**Diethyl 2-Methyl-2-propenyl Phosphate (1e).** Diethyl 2-methyl-2-propenyl phosphate (**1e**) was prepared in the same manner as **1b**, from 2-methyl-2-propen-1-ol (1.44 g, 20 mmol) and diethyl chlorophosphate (3.13 g, 20 mmol) in 93% yield (3.87 g, 18.6 mmol). bp 80 °C/ 0.5 mmHg; R*f* = 0.2 (hexane/ ethyl acetate = 3 : 1). 1H NMR (CDCl3)  1.34 (t, *J* = 7.3 Hz, 6H), 1.78 (s, 3H), 4.13 (dq, *J*P-H = 8.3 Hz, *J* = 7.3 Hz, 4H), 4.43 (d, *J*P-H = 6.9 Hz, 2H), 4.94 (s, 1H), 5.05 (s, 1H); 13C NMR (CDCl3)  15.9 (CH3 x 2), 18.8 (CH3), 63.6 (d, *J*P-C = 4.9 Hz, CH2 x 2), 70.5 (d, *J*P-C = 6.1 Hz, CH2), 113.0 (CH2), 140.0 (quart.); IR (neat film) 2980 (m), 1448 (m), 1392 (m), 1368 (m), 1278 (s), 1166 (m), 1031 (s), 977 (s), 875 (m), 814 (m), 750 (m) cm-1; mass spectrum *m/z* (% relative intensity) 208 (M+, 16), 180 (8), 152 (30), 127 (44), 99 (100), 81 (39), 54 (69). Anal. Calcd for C8H17O4P: C, 46.15; H, 8.23. Found: C, 46.30; H, 8.50.

**Diethyl 3-Buten-2-yl Phosphate (1f).**6Diethyl 3-buten-2-yl phosphate (**1f**) was prepared in the same manner as **1b**, from 3-buten-2-ol (1.44 g, 20 mmol) and diethyl chlorophosphate (3.13 g, 20 mmol) in 95% yield (3.95 g, 19.0 mmol). bp 70 °C/ 0.05 mmHg; R*f* = 0.2 (hexane/ ethyl acetate = 3 : 1); GC 4.87 min (70-190 °C, 10 °C/ min, PEG 2 M). 1H NMR (CDCl3)  1.33 (t, *J* = 7.2 Hz, 3H), 1.35 (t, *J* = 7.2 Hz, 3H), 1.41 (d, *J* = 6.6 Hz, 3H), 4.09 (dq, *J*P-H = 7.9 Hz, *J* = 7.2 Hz, 2H), 4.10 (dq, *J*P-H = 7.9 Hz, *J* = 7.2 Hz, 2H), 4.92 (ddq, *J*P-H = 7.1 Hz, *J* = 6.6, 6.3 Hz, 1H), 5.16 (d, *J* = 9.6 Hz, 1H), 5.30 (d, *J* = 16.8 Hz, 1H), 5.89 (ddd, *J* = 16.8, 9.6, 6.3 Hz, 1H); 13C NMR (CDCl3)  16.1 (CH3), 16.2 (CH3), 21.9 (CH3), 63.57 (d, *J*P-C = 6.1 Hz, CH2), 63.62 (d, *J*P-C = 6.2 Hz, CH2), 75.7 (d, *J*P-C = 4.9 Hz, CH), 116.0 (CH2), 138.2 (CH); IR (neat film) 3535 (w), 2920 (m), 1439 (m), 1390 (m), 1275 (s), 1165 (m), 1098 (m), 1029 (s), 1003 (s), 871 (w), 820 (m), 749 (w), 660 (w) cm-1; mass spectrum *m/z* (% relative intensity) 208 (M+, 3), 193 (3), 151 (64), 127 (64), 99 (100), 81 (38), 54 (83). Anal. Calcd for C8H17O4P: C, 46.15; H, 8.23. Found: C, 45.36; H, 8.72.

**Preparation of *N*-Benzylidenetosylamide.**7A 50 mL two-necked round bottom flask containing a stirring bar and *p*-toluenesulfonamide (3.4 g, 20.0 mmol) was fitted with a rubber septum and a distillation apparatus connected to a balloon filled with nitrogen. Benzaldehyde dimethylacetal (4.56 g, 30.0 mmol) was introduced to the flask. The mixture was heated to 170 °C, and produced methanol was distilled off and collected with a receiver. When methanol was no longer distilled into a receiver, remaining volatile materials were removed under reduced pressure at the same temperature (ca. 170 °C/ 1 mmHg). After cooling the mixture, a residual white solid was recrystallized (hexane-ethyl acetate), and pure*N*-benzylidenetosylamide was obtained in 95% yield (5.23 g, 19.0 mmol). mp 107.0-107.5 °C. 1H NMR (CDCl3)  2.44 (s, 3H), 7.33-7.94 (m, 9H), 9.03 (s, 1H); 13C NMR (CDCl3)  21.7 (CH3), 128.1 (CH x 2), 129.2 (CH x 2), 129.8 (CH x 2), 131.3 (CH x 2), 132.4 (quart.), 134.9 (CH), 135.2 (quart.), 144.6 (quart.), 170.1 (CH); IR (KBr disk) 1596 (m), 1573 (m), 1318 (m), 1296 (m), 1156 (s), 1087 (m), 816 (m), 782 (m), 756 (m), 670 (m), 555 (m) cm-1; mass spectrum *m/z* (% relative intensity) 208 (M+, 10), 207 (41), 155 (38), 104 (14), 92 (13), 91 (100), 77 (15), 65 (32), 51 (21).

**Generation of Allylchromium Reagents and their Reactions with Electrophiles.** A 50 mL two-necked round bottom flask containing a stirring bar and chromium(III) chloride (83.0 mg, 0.52 mmol) was fitted with a rubber septum and a three-way stopcock connected to a balloon filled with argon. The apparatus was purged with argon by pumping-filling *via* a three-way stopcock and dried with a heating-gun under reduced pressure. THF (5.0 mL) was added to the flask, and the suspension was stirred at room temperature for several minutes. The flask was cooled to –78 °C. A solution of butyllithium in hexane (1.61 M, 2.6 mmol, 1.62 mL) was slowly added to the suspension at –78 °C, and the mixture was stirred at the same temperature for 30 min. Allylphosphate **1** (0.43 mmol) was added to the solution of butylchromium ate-type reagent at -78 °C. After the addition of allylphosphate, the dark-colored mixture was stirred at –78 °C for further 5 min to generate an allylic chromium reagent. An electrophile (1.72 mmol) was added to the flask at –78 °C, and the resultant mixture was stirred at the same temperature for 30 min. A reaction was quenched at –78 °C with saturated NH4Cl (10 mL). Insoluble materials of the reaction mixture were filtered off by a Celite pad, and organics of the filtrate were extracted with Et2O (10 mL x 3). Combined organic layers were washed with saturated NaHCO3 (10 mL), and dried over Na2SO4. Solvents were evaporated under reduced pressure. The residue was subjected to short column chromatography on silica gel (hexane/ ethyl acetate = 2:1) to remove a small amount of metal salts involved in the mixture. After estimated yields of products by 1H NMR using dimethyl maleate as an internal standard, products were purified by chromatography on silica gel.

**5-Phenyl-1-pentene**8a **and 5-Phenyl-2-pentene**8b **(Table 1 and 2).** When a saturated solution of NH4Cl (10 mL), instead of an electrophile, was added to a solution of an allylic chromium reagent at –78 °C, a mixture of reduced terminal and internal alkenes, 5-phenyl-1-pentene and 5-phenyl-2-pentene was obtained in 96% yield (60 mg, 0.41 mmol). R*f* = 0.7 (hexane/ ethyl acetate = 50 : 1). 1H NMR (CDCl3)  1.72 (dt, *J* = 15.5, 7.9 Hz, 2H), 2.10 (tt, *J* = 7.9, 7.6 Hz, 2H), 2.62 (t, *J* = 7.6 Hz, 2H), 4.97 (d, *J* = 10.2 Hz, 1H), 5.02 (d, *J* = 15.3 Hz, 1H), 5.78-5.88 (m, 1H), 7.14-7.32 (m, 5H).

**4-Hydroxy-1-decene (2a).**9From diethyl 2-propenyl phosphate (**1c**) (83 mg, 0.43 mmol) and heptanal (196 mg, 1.72 mmol, 240 L), 4-hydroxy-1-decene (**2a**) (62 mg, 0.40 mmol, 93%) was obtained. bp 80 °C/ 0.1 mmHg; R*f* = 0.1 (hexane/ ethyl acetate = 20 : 1). 1H NMR (CDCl3)0.88 (t, *J* = 6.9 Hz, 3H), 1.29-1.52 (m, 10H), 1.59 (d, *J* = 2.6 Hz, 1H), 2.13 (dt, *J* = 14.9, 7.6 Hz, 1H), 2.31 (dtt, *J* = 14.2, 5.6, 1.3 Hz, 1H), 3.63 (br, 1H), 5.13 (d, *J* = 12.9 Hz, 1H), 5.14 (d, *J* = 14.2 Hz, 1H), 5.76-5.91 (m, 1H); 13C NMR (CDCl3)14.1 (CH3), 22.6 (CH2), 25.6 (CH2), 29.3 (CH2), 31.2 (CH2), 36.8 (CH2), 41.9 (CH2), 70.7 (CH), 118.0 (CH2), 134.9 (CH); IR (neat film) 3345 (m), 2915 (s), 1637 (w), 1455 (w), 1435 (w), 1120 (w), 1031 (w), 989 (w), 908 (m) cm-1. Anal. Calcd for C10H20O: C, 76.86; H, 12.90. Found: C, 77.21; H, 13.12.

**4-Hydroxy-4-cyclohexcyl-1-butene (2b).**10From diethyl 2-propenyl phosphate (**1c**) (83 mg, 0.43 mmol) and cyclohexanecarboxaldehyde (193 mg, 1.72 mmol, 208 L), 4-hydroxy-4-cyclohexcyl-1-butene (**2b**) (57 mg, 0.37 mmol, 85%) was obtained. bp 100 °C/ 0.1 mmHg; R*f* = 0.2 (hexane/ ethyl acetate = 20 : 1); GC 6.20 min (70-190 °C, 5 °C/ min, PEG 2 M). 1H NMR (CDCl3)0.99-1.42 (m, 6H), 1.57 (d, *J* = 4.0 Hz, 1H), 1.66-1.42 (m, 5H), 2.07-2.18 (m, 1H), 2.35-2.38 (m, 1H), 3.35-3.43 (m, 1H), 5.13 (dt, *J* = 11.9, 1.0 Hz, 1H), 5.14 (dt, *J* = 15.5, 1.3 Hz, 1H), 5.55 (dddd, *J* = 15.5, 11.9, 8.3, 6.9 Hz, 1H); 13C NMR (CDCl3)26.2 (CH3), 26.3 (CH2), 26.5 (CH2), 28.1 (CH2), 29.1 (CH2), 38.8 (CH2), 43.1 (CH), 74.6 (CH), 118.0 (CH2), 135.5 (CH2); IR (neat film) 3370 (m), 2925 (s), 1634 (w), 1445 (m), 1036 (m), 981 (m), 910 (m) cm-1; mass spectrum *m/z* (% relative intensity) 136 (M+-H2O, 2), 113 (28), 95 (100), 69 (13), 67 (33), 55 (45), 41 (70). Anal. Calcd for C10H18O: C, 77.87; H, 11.76. Found: C, 77.93; H, 12.01.

**5,5-Dimethyl-4-hydroxy-1-hexene (2c).**9From diethyl 2-propenyl phosphate (**1c**) (83 mg, 0.43 mmol) and pivalaldehyde (148 mg, 1.72 mmol, 187 L), 5,5-dimethyl-4-hydroxy-1-hexene (**2c**) (44 mg, 0.34 mmol, 79%) was obtained. bp 50 °C/ 10 mmHg; R*f* = 0.2 (hexane/ ethyl acetate = 20 : 1). 1H NMR (CDCl3)0.92 (s, 9H), 1.61 (s, 1H), 1.98 (dt, *J* = 13.9, 9.6 Hz, 1H), 2.38 (ddd, *J* = 13.9, 5.6, 1.6 Hz, 1H), 3.26 (d, *J* = 10.6 Hz, 1H), 5.14 (d, *J* = 10.6 Hz, 1H), 5.15 (d, *J* = 15.5 Hz, 1H), 5.86 (dddd, *J* = 15.5, 10.6, 9.6, 5.6 Hz, 1H); 13C NMR (CDCl3)26.2 (CH3 x 3), 35.1 (quart.), 37.0 (CH2), 78.6 (CH), 118.2 (CH2), 137.0 (CH); IR (neat film) 3430 (m), 2960 (s), 1639 (m), 1480 (m), 1432 (w), 1393 (m), 1363 (m), 1292 (m), 1209 (m), 1111 (m), 1072 (m), 1008 (m), 991 (m), 861 (m) cm-1; mass spectrum *m/z* (% relative intensity) 87 (M+-allyl, 58), 69 (36), 57 (36), 43 (78), 41 (100). Anal. Calcd for C8H16O: C, 74.94; H, 12.58. Found: C, 74.97; H, 12.75.

**4-Phenyl-4-hydroxy-1-butene (2d).**11From diethyl 2-propenyl phosphate (**1c**) (83 mg, 0.43 mmol) and benzaldehyde (183 mg, 1.72 mmol, 175 L), 4-phenyl-4-hydroxy-1-butene (**2d**) (58 mg, 0.39 mmol, 91%) was obtained. R*f* = 0.1 (hexane/ ethyl acetate = 20 : 1). 1H NMR (CDCl3)2.07 (brs, 1H), 2.51 (dd, *J* = 7.3, 5.6 Hz, 2H), 4.73 (t, *J* = 5.6 Hz, 1H), 5.13 (dd, *J* = 9.2, 1.0 Hz, 1H), 5.17 (dt, *J* = 17.2, 1.0 Hz, 1H), 5.79 (ddt, *J* = 17.2, 9.2, 7.3 Hz, 1H), 7.23-7.35 (m, 5H); 13C NMR (CDCl3)43.7 (CH2), 73.3 (CH), 118.3 (CH2), 125.8 (CH x 2), 127.5 (CH), 128.4 (CH x 2), 134.4 (CH), 143.8 (quart.); IR (neat film) 3380 (m), 1492 (s), 1450 (m), 1044 (m), 913 (m), 757 (m), 697 (s) cm-1; mass spectrum *m/z* (% relative intensity) 148 (M+, 1), 129 (3), 115 (2), 107 (100), 91 (2), 79 (69), 63 (2), 51 (17).

**1-(2’-Propenyl)cyclohexan-1-ol (1e).**9From diethyl 2-propenyl phosphate (**1c**) (83 mg, 0.43 mmol) and cyclohexanone (169 mg, 1.72 mmol, 178 L), 1-(2’-propenyl)cyclohexan-1-ol (**1e**) (57 mg, 0.41 mmol, 96%) was obtained. bp 90 °C/ 3.0 mmHg; R*f* = 0.2 (hexane/ ethyl acetate = 15 : 1); GC 3.37 min (70-190 °C, 5 °C/ min, PEG 2 M). 1H NMR (CDCl3)1.25-1.62 (m, 10H), 1.41 (s, 1H), 2.22 (dt, *J* = 7.6, 1.0 Hz, 2H), 5.07-5.17 (m, 2H), 5.89 (ddt, *J* = 16.8, 10.2, 7.6 Hz, 1H); 13C NMR (CDCl3) 22.1 (CH2 x 2), 25.7 (CH2), 37.3 (CH2 x 2), 70.9 (quart.), 118.5 (CH2), 133.7 (CH); IR (neat film) 3375 (m), 2930 (s), 1443 (m), 1160 (w), 1138 (w), 969 (m), 908 (m) cm-1; mass spectrum *m/z* (% relative intensity) 140 (M+, 2), 122 (2), 99 (67), 81 (100), 55 (81), 41 (73). Anal. Calcd for C9H16O: C, 77.09; H, 11.50. Found: C, 78.44; H, 11.75.

**4-Hydroxy-4-phenyl-1-pentene (2f).** From diethyl 2-propenyl phosphate (**1c**) (83 mg, 0.43 mmol) and acetophenone (207 mg, 1.72 mmol, 201 L), 4-hydroxy-4-phenyl-1-pentene (**2f**) (63 mg, 0.39 mmol, 91%) was obtained. bp 90 °C/ 0.1 mmHg; R*f* = 0.3 (hexane/ ethyl acetate = 10 : 1). 1H NMR (CDCl3)1.54 (s, 3H), 2.11 (s, 1H), 2.49 (dd, *J* = 13.9, 8.2 Hz, 1H), 2.68 (dd, *J* = 13.9, 6.3 Hz, 1H), 5.11 (d, *J* = 10.6 Hz, 1H), 5.12 (d, *J* = 16.8 Hz, 1H), 5.61 (dddd, *J* = 16.8, 10.6, 8.2, 6.3 Hz, 1H), 7.20-7.46 (m, 5H); 13C NMR (CDCl3)29.9 (CH3), 48.4 (CH3), 73.6 (quart.), 119.4 (CH2), 124.7 (CH x 2), 126.9 (CH), 127.8 (CH x 2), 133.7 (CH), 147.6 (quart.); IR (neat film) 3415 (m), 3060 (m), 1632 (w), 1489 (m), 1442 (m), 1371 (m), 1068 (m), 995 (m), 910 (s), 766 (s), 700 (s) cm-1; mass spectrum *m/z* (% relative intensity) 144 (M+-H2O, 2), 129 (5), 121 (92), 105 (13), 91 (5), 77 (33), 65 (6), 51 (34), 43 (100). Anal. Calcd for C11H14O: C, 81.38; H, 8.69. Found: C, 81.51; H, 8.89.

**1-(2’-Propenyl)-2-cyclohexen-1-ol (1g).**12From diethyl 2-propenyl phosphate (**1c**) (83 mg, 0.43 mmol) and 2-cyclohexen-1-one (165 mg, 1.72 mmol), 1-(2’-propenyl)-2-cyclohexen-1-ol (**1g**) (49 mg, 0.36 mmol, 83%) was obtained. bp 70 °C/ 0.1 mmHg; R*f* = 0.2 (hexane/ ethyl acetate = 20 : 1); GC 4.34 min (70-190 °C, 5 °C/ min, PEG 2 M). 1H NMR (CDCl3)  1.57-1.79 (m, 5H), 1.81-2.10 (m, 2H), 2.30 (d, *J* = 7.3 Hz, 2H), 5.12 (d, *J* = 16.5 Hz, 1H), 5.14 (d, *J* = 10.9 Hz, 1H), 5.62 (dt, *J* = 10.2, 2.0 Hz, 1H), 5.85 (dt, *J* = 10.2, 4.0 Hz, 1H), 5.88 (ddt, *J* = 16.5, 10.9, 7.6 Hz, 1H); 13C NMR (CDCl3)  19.0 (CH2), 25.2 (CH2), 35.5 (CH2), 46.7 (CH2), 69.2 (quart.), 118.6 (CH2), 130.2 (CH), 132.2 (CH), 133.7 (CH); IR (neat film) 3370 (m), 2930 (s), 1633 (m), 1427 (m), 1170 (m), 970 (s), 908 (s), 733 (m) cm-1; mass spectrum *m/z* (% relative intensity) 120 (M+-H2O, 3), 97 (100), 91 (8), 79 (45), 67 (28), 55 (67), 41 (73). Anal. Calcd for C9H14O: C, 78.21; H, 10.21. Found: C, 78.18; H, 10.43.

***N*-(1-Phenyl-3-butenyl)tosylamide (2h).**13From diethyl 2-propenyl phosphate (**1c**) (83 mg, 0.43 mmol) and *N*-benzylidenetosylamide (445 mg, 1.72 mmol), *N*-(1-phenyl-3-butenyl)tosylamide (**2h**) (109 mg, 0.36 mmol, 84%) was obtained. Recrystallized from hexane/ ethyl acetate = 10 : 1. 1H NMR (CDCl3)2.37 (s, 3H), 2.46 (dd, *J* = 6.9, 6.6 Hz, 2H), 4.38 (dt, *J* = 6.3, 6.6 Hz, 1H), 4.90 (brd, *J* = 6.3 Hz, 1H), 5.05 (d, *J* = 15.8 Hz, 1H), 5.06 (d, *J* = 11.2 Hz, 1H), 5.51 (ddt, *J* = 15.8, 11.2, 6.9 Hz, 1H), 7.05-7.19 (m, 7H), 7.55 (d, *J* = 8.6 Hz, 2H); 13C NMR (CDCl3)21.5 (CH3), 41.9 (CH2), 57.1 (CH), 119.3 (CH2), 126.6 (CH x 2), 127.2 (CH x 2), 127.4 (CH), 128.4 (CH x 2), 129.3 (CH x 2), 133.1 (CH), 137.4 (quart.), 140.3 (quart.), 143.1 (quart.); IR (KBr disk) 3255 (m), 1600 (m), 1496 (m), 1456 (s), 1318 (s), 1291 (m), 1164 (s), 1096 (s), 1059 (s), 991 (m), 954 (m), 918 (s), 818 (m), 760 (m), 702 (s), 673 (s), 560 (s) cm-1; mass spectrum *m/z* (% relative intensity) 260 (M+-allyl, 80), 207 (1), 171 (3), 155 (47), 129 (19), 104 (11), 91 (100), 77 (14), 65 (31), 51 (19), 41 (17).

***N*-Phenyl-3-butenamide (2i).**14From diethyl 2-propenyl phosphate (**1c**) (83 mg, 0.43 mmol) and phenyl isocyanate (213 mg, 1.72 mmol), *N*-phenyl-3-butenamide (**2i**) (52 mg, 0.32 mmol, 75%) was obtained. Recrystallized from hexane/ ethyl acetate = 20 : 1. 1H NMR (CDCl3)3.17 (d, *J* = 6.9 Hz, 2H), 5.31 (d, *J* = 17.5 Hz, 1H), 5.33 (d, *J* = 9.9 Hz, 1H), 6.03 (ddt, *J* = 17.5, 9.9, 6.9 Hz, 1H), 7.07-7.51 (m, 6H), 7.5 (brs, 1H); 13C NMR (CDCl3)42.7 (CH2), 119.9 (CH x 2), 120.5 (CH2), 124.4 (CH), 129.0 (CH x 2), 131.1 (CH), 137.7 (quart.), 168.7 (quart.); IR (KBr disk) 3295 (s), 1657 (s), 1607 (s), 1554 (s), 1499 (s), 1443 (s), 1402 (s), 1354 (s), 1306 (s), 1253 (s), 1191 (s), 992 (m), 944 (m), 921 (s), 835 (w), 750 (s), 690 (s) cm-1; mass spectrum *m/z* (% relative intensity) 161 (M+, 31), 120 (14), 93 (100), 77 (23), 65 (22), 41 (75).

**2-Methyl-4-hydroxy-1-decene (2j)**.15 From diethyl 2-methyl-2-propenyl phosphate (**1e**) (89 mg, 0.43 mmol) and heptanal (196 mg, 1.72 mmol, 240 L), 2-methyl-4-hydroxy-1-decene (**2j**) (63 mg, 0.37 mmol, 86%) was obtained. bp 85 °C/ 0.1 mmHg; R*f* = 0.2 (hexane/ ethyl acetate = 20 : 1). 1H NMR (CDCl3)0.89 (t, *J* = 6.6 Hz, 3H), 1.30-1.52 (m, 11H), 1.76 (s, 3H), 2.08 (dd, *J* = 13.9, 9.2 Hz, 1H), 2.21 (dd, *J* = 13.9, 3.6 Hz, 1H), 3.72 (br, 1H), 4.80 (s, 1H), 4.88 (s, 1H); 13C NMR (CDCl3)14.0 (CH3), 22.4 (CH3), 22.6 (CH2), 25.7 (CH2), 29.3 (CH2), 31.8 (CH2), 37.1 (CH2), 46.2 (CH2), 68.7 (CH), 113.3 (CH2), 142.9 (quart.); mass spectrum *m/z* (% relative intensity) 152 (M+-H2O, 1), 113 (11), 97 (8), 85 (3), 69 (11), 56 (100), 55 (91), 41 (83).

**3-Methyl-4-hydroxy-1-decene (2k)**16 **and 5-Hydroxy-2-undecene (2k’).** From diethyl 2-butenyl phosphate (**1d**) (89 mg, 0.43 mmol) and heptanal (196 mg, 1.72 mmol, 240 L), a mixture of 3-methyl-4-hydroxy-1-decene (**2k**) and 5-hydroxy-2-undecene (**2k’**) (65 mg, 0.38 mmol, 89%; **2k** / **2k’** = 78 / 22, *syn*-**2k** / *anti*-**2k** = 24 / 76) was obtained. An authentic sample of *anti*-**2k** was prepared by the reported procedure, and the isomeric ratio was determined by GC and 1HNMR. bp 80 °C/ 0.1 mmHg; R*f* = 0.1 (hexane/ ethyl acetate = 20 : 1); *anti*: GC 7.87 min (80 °C, PEG 2 M); *syn*: GC 9.27 min (80 °C, PEG 2 M). 1H NMR (CDCl3) (a mixture of *anti* and *syn*)0.88 (t, *J* = 6.93 Hz, 6H), 1.02 (d, *J* = 6.9 Hz, 3H x 0.76), 1.03 (d, *J* = 6.9 Hz, 3H x 0.24), 1.05-1.59 (m, 8H), 2.17-2.31 (m, 1H), 3.38 (br, 1H x 0.76), 3.49 (br, 1H x 0.24), 5.04-5.14 (m, 2H), 5.69-5.87 (m, 1H); 13C NMR (CDCl3) *syn* isomer14.1 (CH3), 16.3 (CH3), 22.6 (CH2), 26.1 (CH2), 29.4 (CH2), 31.9 (CH2), 34.0 (CH2), 43.4 (CH), 74.7 (CH), 115.2 (CH2), 140.4 (CH), *anti* isomer14.0 (CH3), 14.1 (CH3), 22.6 (CH2), 25.7 (CH2), 29.4 (CH2), 31.9 (CH2), 34.3 (CH2), 44.1 (CH), 74.7 (CH), 116.2 (CH2), 141.2 (CH); IR (neat film) 3355 (m), 2915 (s), 1629 (w), 1455 (m), 1414 (w), 1375 (w), 992 (m), 909 (m), 659 (w) cm-1; mass spectrum *m/z* (% relative intensity) 170 (M+, 1), 152 (1), 128 (1), 113 (5), 97 (25), 85 (3), 69 (14), 55 (100),43 (78). Anal. Calcd for C11H22O: C, 77.58; H, 13.02. Found: C, 77.53; H, 13.41.

**3,5,5-Trimethyl-4-hydroxy-1-hexene (2l)**.17a From diethyl 2-butenyl phosphate (**1d**) (89 mg, 0.43 mmol) and pivalaldehyde (148 mg, 1.72 mmol, 187 L), 3,5,5-trimethyl-4-hydroxy-1-hexene (**2l**) (44 mg, 0.34 mmol, 79%; *syn*-**2l** / *anti*-**2l** = 58 / 42) was obtained. An authentic sample of *anti*-**2k** was prepared by the reported procedure, and the isomeric ratio was determined by GC and 1H NMR. bp 80 °C/ 20 mmHg; R*f* = 0.1 (hexane/ ethyl acetate = 20 : 1); *anti*: GC 3.13 min (60 °C, PEG 2 M); *syn*: GC 3.61 min (60 °C, PEG 2 M). 1H NMR (CDCl3) (a mixture of *anti* and *syn*)  0.93 (s, 6H x 0.58), 0.96 (s, 9H x 0.42), 1.05 (d, *J* = 6.6 Hz, 3H x 0.42), 1.12 (d, *J* = 6.9 Hz, 3H x 0.58), 1.43 (d, *J* = 5.3 Hz, 1H x 0.42), 1.47 (d, *J* = 6.6 Hz, 1H x 0.58), 2.46-2.60 (m, 1H), 3.13 (dd, *J* = 6.6, 2.3 Hz, 1H x 0.42), 3.24 (dd, *J* = 5.3, 4.0 Hz, 1H x 0.58), 5.03 (ddd, *J* = 17.2, 11.6, 10.6 Hz, 2H), 5.81-6.02 (m, 1H); 13C NMR (CDCl3) *syn* isomer  20.7 (CH3), 26.9 (CH3 x 3), 35.8 (quart.), 39.4 (CH), 82.8 (CH), 115.3 (CH2), 140.3 (CH), *anti* isomer  14.7 (CH3), 27.1 (CH3 x 3), 35.9 (quart.), 39.6 (CH), 81.4 (CH), 113.1 (CH2), 144.4 (CH); IR (neat film) 3470 (m), 2960 (s), 1480 (m), 1460 (m), 1363 (m), 1105 (m), 995 (m), 905 (m) cm-1; mass spectrum *m/z* (% relative intensity). Anal. Calcd for C9H18O: C, 75.99; H, 12.75. Found: C, 75.09; H, 12.84.

**4-(2’-Propenyl)-4-methyl-4-butanolide (2m).**18From diethyl 2-propenyl phosphate (**1c**) (83 mg, 0.43 mmol) and methyl levulinate (224 mg, 1.72 mmol), 4-(2’-propenyl)-4-methyl-4-butanolide (**2m**) (52 mg, 0.37 mmol, 86%) was obtained by the standard workup procedure followed by acidic treatment. R*f* = 0.2 (hexane/ ethyl acetate = 5 : 1). 1H NMR (CDCl3)  1.40 (s, 3H), 1.96 (ddd, *J* = 12.9, 9.3, 7.3 Hz, 1H), 2.16 (dt, *J* = 12.9, 8.6 Hz, 1H), 2.42 (d, *J* = 6.9 Hz, 2H), 2.52-2.63 (m, 2H), 5.13-5.20 (m, 2H), 5.79 (ddt, *J* = 16.5, 10.9, 7.3 Hz, 1H); 13C NMR (CDCl3)  26.1 (CH2), 29.1 (CH2), 32.1 (CH2), 45.3 (CH2), 85.9 (quart.), 119.8 (CH2), 132.1 (CH), 176.7 (quart.); IR (neat film) 1768 (s), 1382 (m), 1294 (m), 1215 (m), 1155 (m), 938 (m) cm-1; mass spectrum *m/z* (% relative intensity) 122 (M+-H2O, 1), 99 (87), 71 (19), 55 (16), 43 (100). Anal. Calcd for C8H12O: C, 68.55; H, 8.63. Found: C, 68.44 ; H, 8.60.

**Preparation of Diethyl 2-Propynyl Phosphate (3).** A 100 mL two-necked round bottom flask containing a stirring bar was fitted with a rubber septum and a three-way stopcock connected to a balloon filled with nitrogen. The apparatus was dried with a heating-gun under reduced pressure and purged with nitrogen. 2-Propyn-1-ol (1.12 g, 20 mmol) and pyridine (20 mL) were introduced to the flask, and the mixture was cooled to 0 °C. Diethyl chlorophosphate (3.13 g, 20 mmol) was slowly added to the flask. The temperature of the mixture was raised to room temperature over 30 min. After stirring the mixture for further 2 h, a 5% solution of CuSO4 (10 mL) was added to the mixture. Extraction with ethyl acetate (30 mL x 3), washing the organic layer with NaHCO3 (15 mL), drying over Na2SO4, and evaporation of solvents gave a crude product. A pure diethyl 2-propynyl phosphate (**3**) was obtained by chromatography on silica gel (3.46 g, 18 mmol, 90%). bp 110 °C/ 0.2 mmHg; R*f* = 0.1 (hexane/ ethyl acetate = 2 : 1). 1H NMR (CDCl3)  1.35 (t, *J* = 7.3 Hz, 6H), 2.57 (t, *J* = 2.3 Hz, 1H), 4.15 (dq, *J*P-H = 7.9 Hz, *J* = 7.3 Hz, 4H), 4.66 (dd, *J*P-H = 10.6 Hz, *J* = 7.3 Hz, 2H); 13C NMR (CDCl3)  16.1 (CH3 x 2), 54.9 (d, *J*P-C = 4.9 Hz, CH2), 64.1 (d, *J*P-C = 6.2 Hz, CH2 x 2), 75.7 (quart.), 77.6 (CH); IR (neat film) 3275 (m), 2985 (s), 1440 (m), 1395 (m), 1369 (m), 1271 (s), 1166 (m), 1026 (s), 995 (s), 834 (m) cm-1; mass spectrum *m/z* (% relative intensity) 193 (M+, 3), 163 (3), 149 (5), 136 (100), 119 (12), 99 (27), 81 (27), 55 (22). Anal. Calcd for C7H13O4P: C, 43.76; H, 6.82. Found: C, 43.74; H, 6.98.

**Generation of Propargylchromium Reagent and Reactions with Electrophiles.** A 50 mL two-necked round bottom flask containing a stirring bar and chromium(III) chloride (83.0 mg, 0.52 mmol) was fitted with a rubber septum and a three-way stopcock connected to a balloon filled with argon. The apparatus was purged with argon by pumping-filling *via* a three-way stopcock and dried with a heating-gun under reduced pressure. THF (5.0 mL) was added to the flask, and the suspension was stirred at room temperature for several minutes. The flask was cooled to –78 °C. A solution of butyllithium in hexane (1.61 M, 2.6 mmol, 1.62 mL) was slowly added to the suspension at –78 °C, and the mixture was stirred at the same temperature for 30 min. Propargyl phosphate **3** (0.43 mmol) was added to the solution of butylchromium ate-type reagent at -78 °C. After the addition of propargyl phosphate **3**, the dark-colored mixture was stirred at –78 °C for further 30 min to generate a propargylchromium reagent. An electrophile (1.72 mmol) was added to the flask at –78 °C, and the resultant mixture was stirred at the same temperature for 2 h. A reaction was quenched at –78 °C with saturated NH4Cl (10 mL). Insoluble materials of the reaction mixture were filtered off by a Celite pad, and organics of the filtrate were extracted with Et2O (10 mL x 3). Combined organic layers were washed with saturated NaHCO3 (10 mL), and dried over Na2SO4. Solvents were evaporated under reduced pressure. The residue was subjected to short column chromatography on silica gel (hexane/ ethyl acetate = 2:1) to remove a small amount of metal salts involved in the mixture. After estimated yields of products by 1H NMR using dimethyl maleate as an internal standard, products were purified by chromatography on silica gel.

**1-Phenyl-3-butyn-1-ol (4a).**19From diethyl 2-propynyl phosphate (**3**) (83 mg, 0.43 mmol) and benzaldehyde (183 mg, 1.72 mmol, 175 L), 1-phenyl-3-butyn-1-ol (**4a**) (44 mg, 0.30 mmol, 75%) was obtained. R*f* = 0.2 (hexane/ ethyl acetate = 10 : 1). 1H NMR (CDCl3)2.08 (t, *J* = 2.6 Hz, 1H), 2.4-2.6 (brs, 1H), 2.61 (ddd, *J* = 15.8, 6.6, 2.6 Hz, 1H), 2.66 (ddd, *J* = 15.8, 6.3, 2.6 Hz, 1H), 4.85 (t, *J* = 6.3 Hz, 1H), 7.26-7.49 (m, 5H); 13C NMR29.4 (CH2), 71.0 (quart.), 72.3 (CH), 80.7 (CH), 125.8 (CH2), 128.0 (CH), 128.5 (CH x 2), 142.5 (quart.); IR (neat film) 3380 (s), 1495 (m), 1450 (m), 1048 (s), 756 (s), 698 (s), 633 (s) cm-1; mass spectrum *m/z* (% relative intensity) 146 (M+, 1), 145 (1), 115 (1), 107 (100), 79 (61), 77 (52), 51 (23). HRMS calcd for C10H8 (M+-H2O): 128.0626, found: 128.0630.

**2-(1’-Hydroxy-3’-butynyl)furan (4b).**19From diethyl 2-propynyl phosphate (**3**) (83 mg, 0.43 mmol) and furfural (165 mg, 1.72 mmol), 2-(1’-hydroxy-3-butynyl)furan (**4b**) (42 mg, 0.31 mmol, 73%) was obtained. bp 120 °C/ 1.0 mmHg; R*f* = 0.3 (hexane/ ethyl acetate = 7 : 1). 1H NMR (CDCl3)2.08 (t, *J* = 2.6 Hz, 1H), 2.38 (s, 1H), 2.78 (dd, *J* = 6.3, 2.6 Hz, 2H), 4.89 (br, 1H), 6.35 (s, 1H), 6.36 (s, 1H), 7.40 (t, *J* = 1.3 Hz, 1H); 13C NMR26.1 (CH2), 66.1 (CH), 71.2 (quart.), 79.8 (CH), 106.6 (CH), 110.3 (CH), 142.3 (CH), 154.6 (quart.); mass spectrum *m/z* (% relative intensity) 136 (M+, 6), 118 (1), 97 (91), 69 (14), 41 (100).

**4-Hydroxy-1-decyne (4c) and 4-Hydroxy-deca-1,2-diene (4c’).**19From diethyl 2-propynyl phosphate (**3**) (83 mg, 0.43 mmol) and heptanal (196 mg, 1.72 mmol, 240 L), a mixture of 4-hydroxy-1-decyne (**4c**) and 4-hydroxy-deca-1,2-diene (**4c’**) (47 mg, 0.30 mmol, 70%) was obtained.

*4-Hydroxy-1-decyne (****4c****)*: bp 90 °C/ 1.0 mmHg; R*f* = 0.2 (hexane/ ethyl acetate = 10 : 1). 1H NMR (CDCl3)0.87 (t, *J* = 6.9 Hz, 3H), 1.27-1.48 (m, 8H), 1.52 (t, *J* = 6.2 Hz, 2H), 1.92 (dd, *J* = 5.0, 2.6 Hz, 1H), 2.05 (t, *J* = 2.6 Hz, 1H), 2.30 (ddd, *J* = 16.5, 6.6, 2.6 Hz, 1H), 2.42 (ddd, *J* = 16.5, 4.6, 2.6 Hz, 1H), 3.70-3.80 (m, 1H); 13C NMR14.5 (CH3), 23.0 (CH2), 26.0 (CH2), 27.8 (CH2), 29.6 (CH2), 32.2 (CH2), 36.7 (CH2), 70.4 (CH), 71.2 (quart.), 81.4 (CH); IR (neat film) 3360 (s), 3295 (s), 2930 (s), 2850 (s), 1465 (m), 1456 (m), 1420 (m), 1120 (w), 1074 (m), 1044 (m), 625 (s) cm-1; mass spectrum *m/z* (% relative intensity) 154 (M+, 1), 125 (1), 115 (13), 97 (34), 69 (30), 55 (100), 41 (72). Anal. Calcd for C10H18O: C, 77.86; H, 11.76. Found: C, 77.66; H, 11.91.

*4-Hydroxy-deca-1,2-diene (****4c’****)*: R*f* = 0.2 (hexane/ ethyl acetate = 7 : 1). 1H NMR (CDCl3)0.88 (t, *J* = 6.9 Hz, 3H), 1.29-1.66 (m, 10H), 1.94-2.01 (m, 2H), 4.01 (br, 1H), 4.84 (dt, *J* = 4.9, 2.0 Hz, 2H); 13C NMR14.0 (CH3), 22.6 (CH2), 25.5 (CH2), 29.2 (CH2), 31.8 (CH2), 35.6 (CH2), 72.0 (CH), 98.5 (CH2), 107.7 (quart.), 204.4 (quart.).

**References**

1. (a) Wadsworth, W. S.; Emmons, W. D. *Org. Synth.* **Coll. Voll. V**, 547-549. (b) Trippett, S. *Pure Appl. Chem.* **1964**, *9*, 255-269.

2. (a) Winterfeldt, E. *Synthesis* **1975**, 617-630. (1,4-reduction was occurred using LiAlH4.) (b) 5-phenyl-2-pentene-1-ol [75553-23-0]: Shimizu, M.; Ando, R.; Kuwajima, I. *J. Org. Chem*. **1984**, *49*, 1230-1238.

3. Newman, M. S.; Wotiz, J. H. *J. Am. Chem. Soc*. **1949**, *71*, 1292-1297.

4. For the synthesis and the reactions of phosphates, see (a) Murahashi, S.; Taniguchi, Y.; Imada, Y.; Tanigawa, Y. *J. Org. Chem*. **1989**, *54*, 3292-3303. (b) Itoh, A.; Ozawa, S.; Oshima, K.; Sasaki, S.; Yamamoto, H.; Hiyama, T.; Nozaki, H. *Bull. Chem. Soc. Jpn*. **1980**, *53*, 2357. (c) Tanaka, H.; Hai, A. K. M. A.; Sadakane, M.; Okumoto, H.; Torii, S. *J. Org. Chem*. **1994**, *59*, 3040. (d) Matsubara, S.; Wakamatsu, K.; Morizawa, Y.; Tsuboniwa, N. *Bull. Chem. Soc. Jpn*. **1985**, *58*, 1196-1199.

5 (a) Tanigawa, Y.; Nishimura, K.; Kawasaki, A. Murahashi, S. *Tetrahedron Lett*. **1982**, *23*, 5549. (b) Murahashi, S.; Imada, Y. *Chem. Lett*. **1985**, 1477-1480. (c) Murahashi, S.; Imada, Y.; Taniguchi, Y.; Higashiura, S. *Tetrahedron Lett*. **1988**, *29*, 4945-4948.

6. Araki, S.; Butsugan, Y. *J. Chem. Soc. Perkin Trans. I*, **1984**, 969-972.

7. (a) Albrecht, R.; Kresze, G.; Mlakar, B. *Chem. Ber*. **1964**, *87*, 487. (b) Jennings, W. B.; Lovely, C. S. *Tetrahedron Lett*. **1988**, *29*, 3725. (c) Trost, B. M.; Marrs, C. *J. Org. Chem*. **1991**, *56*, 6468.

8. (a) Traynelis, V. J.; Hergenrother, W. L.; Livingston, J. R.; Valicenti, J. A. *J. Org. Chem*. **1962**, *27*, 2377-2383. (b) 5-phenyl-2-pentene: La Combe, E. M.; Stewart, B. *J. Am. Chem. Soc*. **1961**, *83*, 3457-3461.

9. (a) Katzenellebogen, J. A.; Lenox, R. S. *J. Org. Chem*. **1973**, *38*, 326-335.

10. Cyclohexanemethanol -2-propenyl [69036-26-6]: (a) Peruzzo, V.; Tagliavini, G. *J. Organomet. Chem*. **1978**, *162*, 37-44.

11. Hoffmann, R. W.; Herold, T. *Chem. Ber*. **1981**, *114*, 375-383.

12. House, H. O.; Wilkins, J. M. *J. Org. Chem*. **1978**, *43*, 2443-2454.

13. 4-methyl-*N*-(1-phenyl-3-butenyl)-benzenesulfonamide[19551-05-8]: (a) Guenter, K.; Udo, W. *Ann. Chem*. **1972**, *762*, 93-105.

14. *N*-phenyl-3-butenamide[13140-15-3]: (a) Brown, R. F. C.; Eastwood, F. W.; Harrington, K. J. *Aust. J. Chem*. **1974**, *27*, 2373-2384.

15. 2-Methyl-1-decene-4-ol [53684-18-7]: (a) Hegedus, L. S.; Wagner, S. D.; Waterman, E. L.; Hansen, K. S. *J. Org. Chem*. **1975**, *44*, 593-598.

16. (a) Wilson, S. R.; Guazzaroni, M. E. *J. Org. Chem*. **1989**, *54*, 3087-3091. (b) Miyake, H.; Yamamura, K. *Chem. Lett*. **1992**, 1369-1372.

17. (a) Seebach, D.; Widler, L. Helv. *Chim. Acta*, **1982**, *65*, 1972. (b) Weidmann, B.; Seebach, D. *Angew. Chem. Int. Ed. Engl*. **1983**, *22*, 31.

18. 4-Methyl-4 (2-propenyl)-butanolide: Einhorn, C.; Luche, J.-L. *J. Organomet. Chem*. **1987**, *322*, 177-183.

1. Tanaka, H.; Hamatani, T.; Yamashita, S.; Torii, S. *Chem. Lett*. **1986**, 1461-1462.
